# Supplementary material for: Structurally characterized one oxo–desoxo bridged Mo2–bis(dithiolene) complex and its interconversion to a discrete oxo or desoxo DMSOR model
Source: Royal Society of Chemistry journal article supplement (doi:10.1039/c9nj01020c), 2019-01-01
Supplement: c9nj01020c1.pdf [file c9nj01020c1.pdf]

## Electronic Supporting Information

### **Structurally Characterized One Oxo-Desoxo Bridged Mo<sub>2</sub>-bis(dithiolene) Complex and its Interconversion to Discrete Oxo or Desoxo DMSOR Model**

*Golam Moula, Moumita Bose and Sabyasachi Sarkar\**

*Nanoscience and Synthetic Leaf Laboratory at Downing Hall, Center for Healthcare Science and  
Technology, Indian Institute of Engineering Science and Technology, Shibpur, Botanic Garden,  
Howrah 711103, West Bengal, India.*

## Table of Contents

| <u>Contents</u>                                                                              | <u>Page</u> |
|----------------------------------------------------------------------------------------------|-------------|
| 1. Tentative Mechanisms for the Formation of the Complexes <b>1</b> , <b>2</b> and <b>3</b>  | S2-S3       |
| 2. Conversion of the Complex <b>1</b> into Tris                                              | S4          |
| 3. UV-Vis of the Raw Reaction Soup and Isolated Complex <b>1</b>                             | S5          |
| 4. Mo–O=Mo Plane which Bisects the Molecule                                                  | S6          |
| 5. Structure of the Anion of the Complex <b>1</b> with Selected Distances                    | S6          |
| 6. Bond Valence Sum Calculations for complex <b>1</b>                                        | S7          |
| 7. Crystallographic Packing                                                                  | S8          |
| 8. IR                                                                                        | S9          |
| 9. EPR                                                                                       | S10         |
| 10. Magnetism                                                                                | S11         |
| 11. PL Spectra of the Complex <b>1</b> at Different Excitation Wavelengths                   | S12         |
| 12. Excitation Spectra of the Complex <b>1</b> for Emission at 470 nm and 615 nm Wavelengths | S13         |
| 13. Computational Details                                                                    | S14-S18     |
| 14. References                                                                               | S19         |

# 1. Tentative Mechanisms for the Formation of the Complexes 1, 2 and 3

## Step 1: Protonation of Mo=O

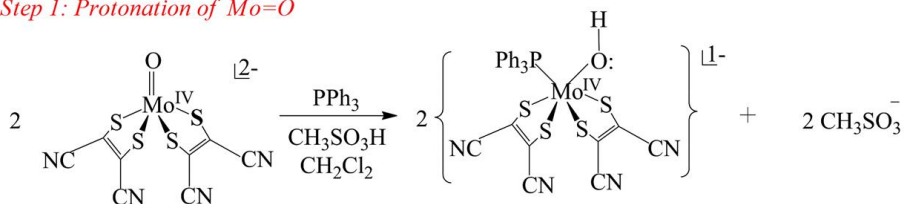

## Step 2: Condensation reaction and Product (1) formation

Path 1: Condensation reaction :

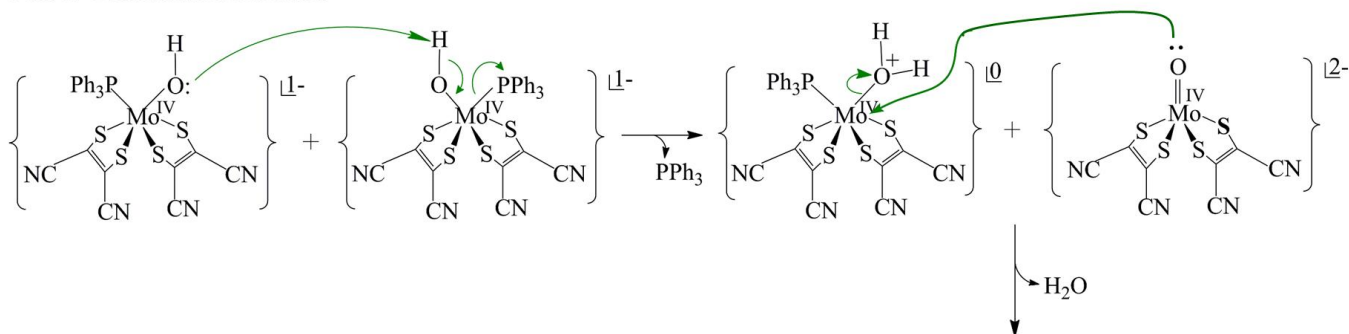

Balanced Reaction:

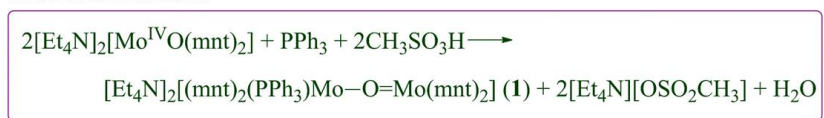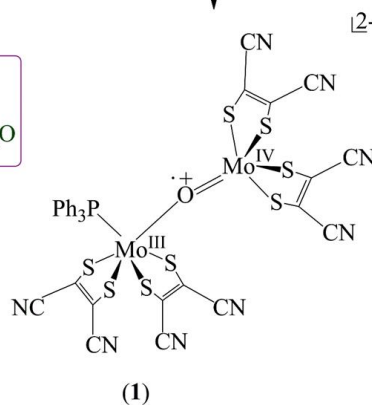

Path 2: Inter ligand exchange :

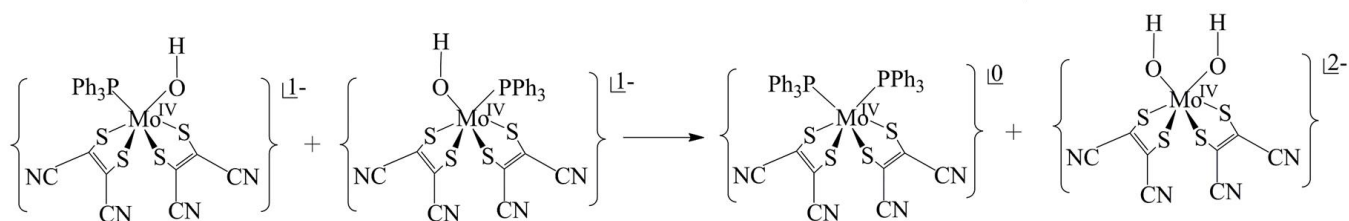

Scheme S1. A tentative mechanism for the formation of the complex (1).

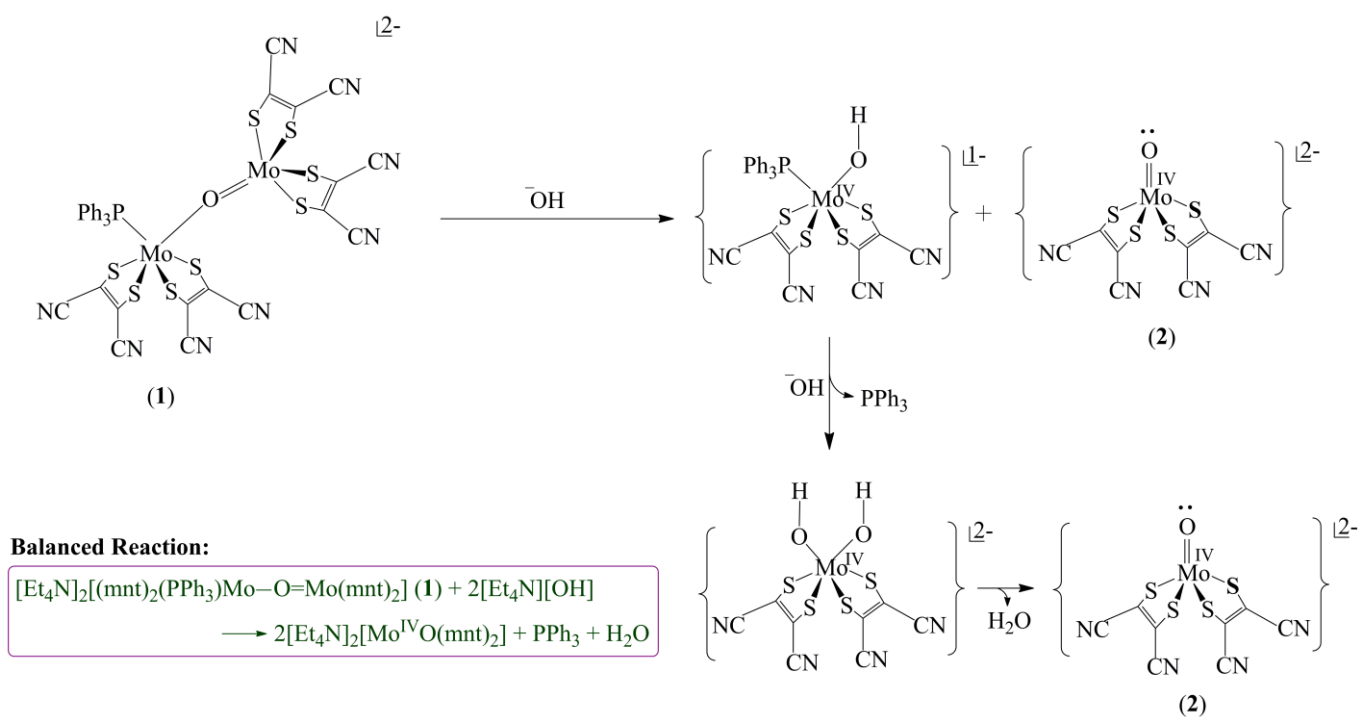

**Scheme S2.** A tentative mechanism for the formation of the complex (2).

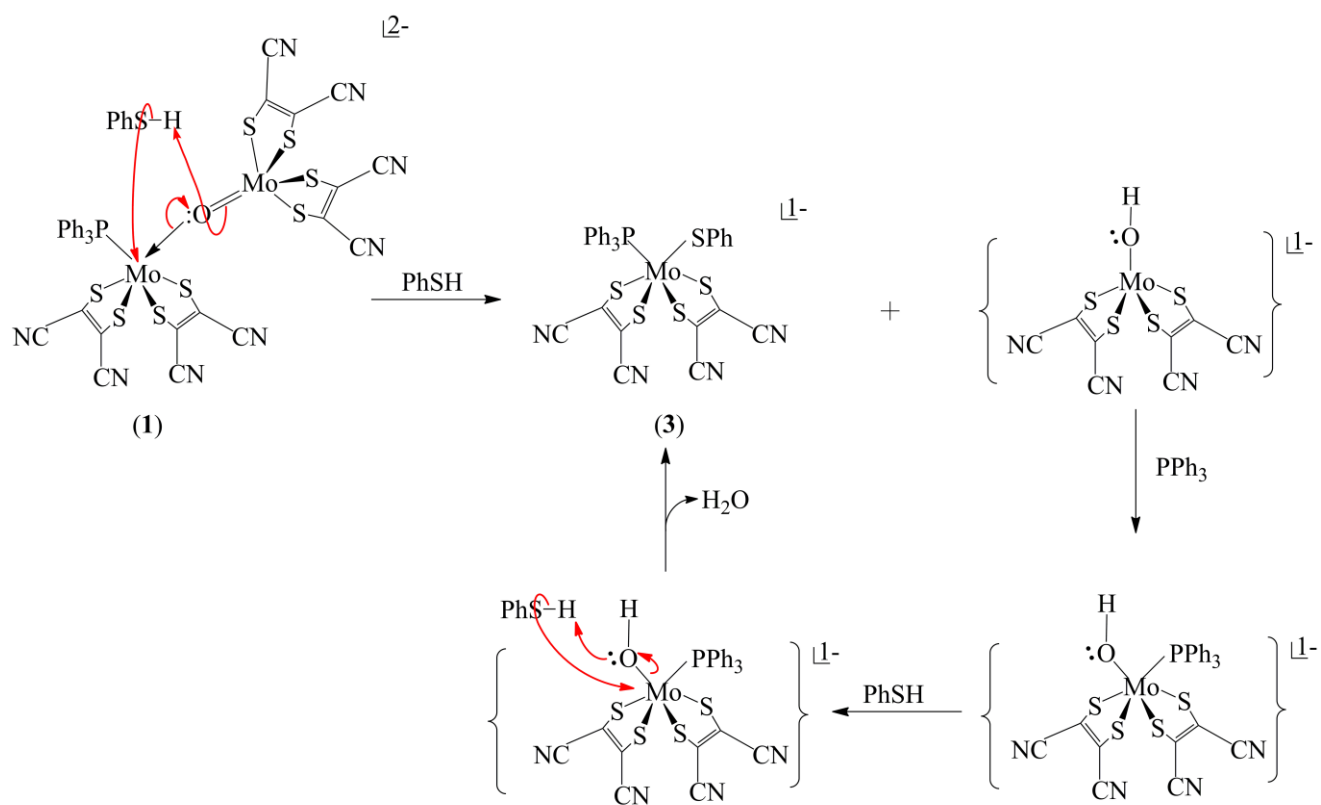

**Scheme S3.** A tentative mechanism for the formation of the complex (3).

## 2. Conversion of the Complex 1 into Tris:

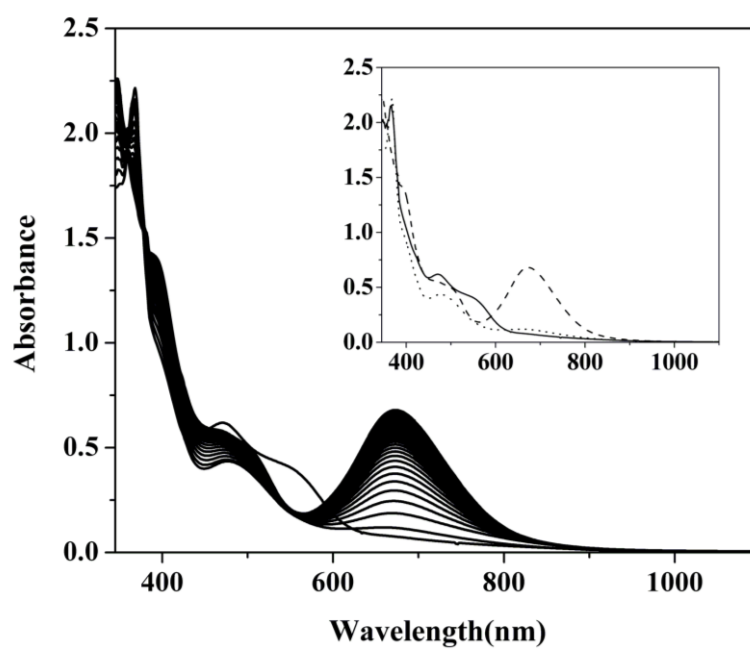

**Figure S-1.** Conversion of  $[\text{Et}_4\text{N}]_2[\text{Mo}(\text{PPh}_3)(\text{mnt})_2\text{-O-Mo}(\text{mnt})_2]$  (**1**) to  $[\text{Et}_4\text{N}]_2[\text{Mo}^{\text{IV}}(\text{mnt})_3]$  in dichloromethane at 25°C. Concentration of  $[\text{Et}_4\text{N}]_2[\text{Mo}(\text{PPh}_3)(\text{mnt})_2\text{-O-Mo}(\text{mnt})_2]$  (**1**) =  $1 \times 10^{-4}$  M. Total time = 16 min. Scan rate = 15 Sec / scan. Inset: immediate spectra of complex (solid line), after 15 seconds (dotted line) and final tris (dithiolene) species(dashed line).

### 3. UV-Vis of the Raw Reaction Soup and Isolated Complex 1:

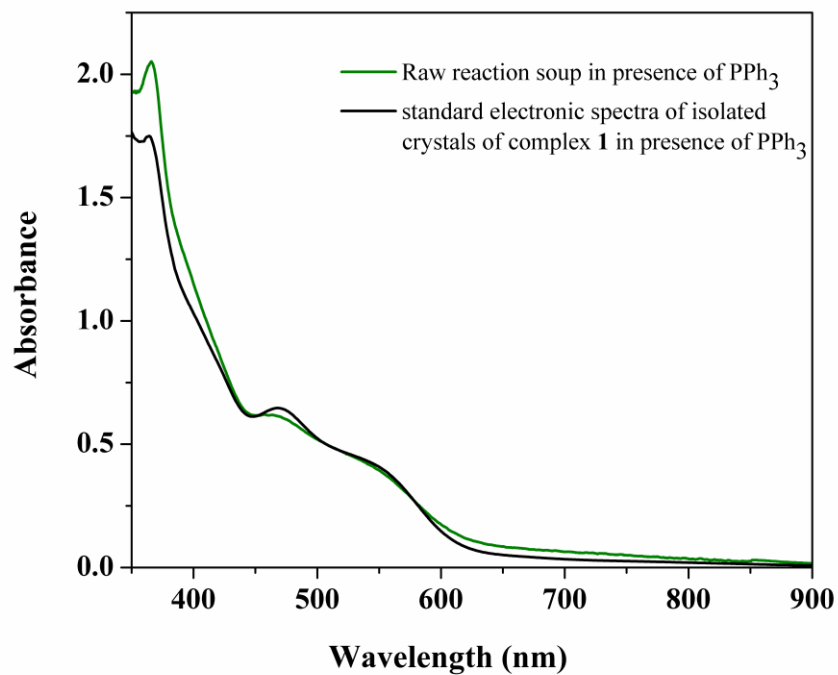

**Figure S-2.** UV-Vis absorption spectra of raw reaction soup (green) from which complex **1** was isolated and isolated complex **1** ( $10^{-4}$  M). Both in presence of excess PPh<sub>3</sub> (black) in dichloromethane.

#### 4. Mo–O=Mo Plane is Bisecting the Molecule:

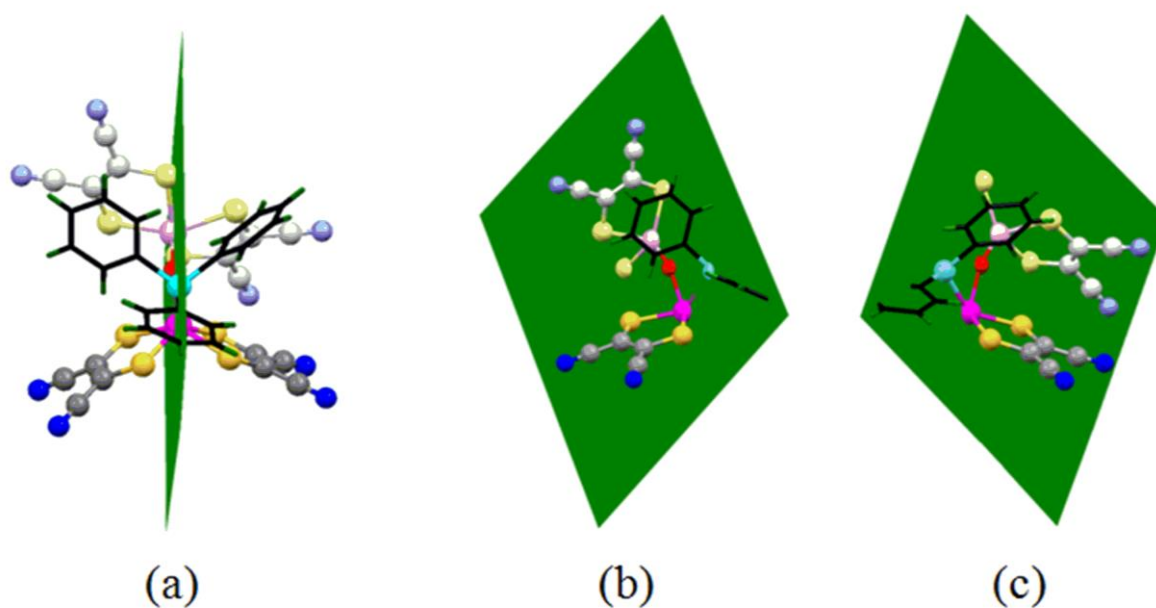

**Figure S-3.** Plane containing Mo–O=Mo is bisecting the molecule. (a) front view, (b) left-side view, (c) right-side view.

#### 5. Structure of the Anion of the Complex 1 with Selected distances:

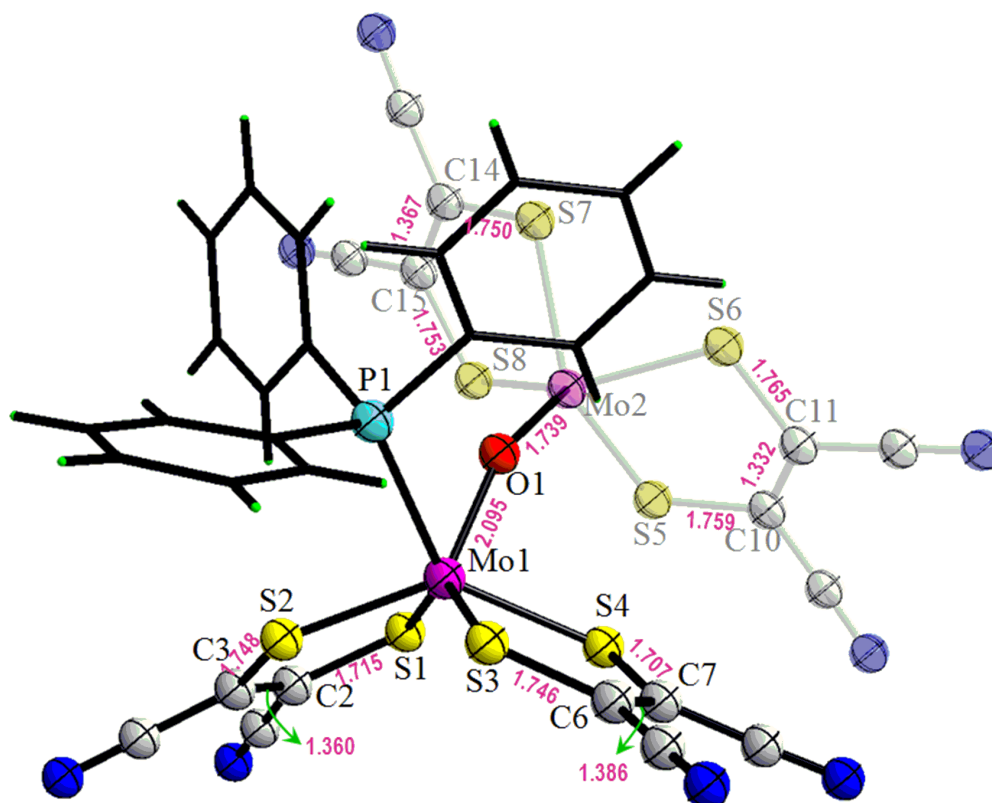

**Figure S-4.** Structure of the anion of **1** with selected distances and selected atoms labeling scheme. Five coordinated molybdenum with two  $\text{mnt}^{2-}$  has been lightened in colour for clarity.

**6. Table S-1: Bond Valence Sum Calculations for complex 1**

| <b>Mo</b> | <b>Assumed oxidation state</b> | <b>Bond valence sum</b> | <b>% Deviation from assumed oxidation state</b> |
|-----------|--------------------------------|-------------------------|-------------------------------------------------|
| 1         | +3                             | 2.823                   | 5.9                                             |
|           | +4                             | 3.576                   | 10.6                                            |
| 2         | +3                             | 3.567                   | 18.9                                            |
|           | +4                             | 4.38                    | 9.5                                             |



## 7. Crystal Packing:

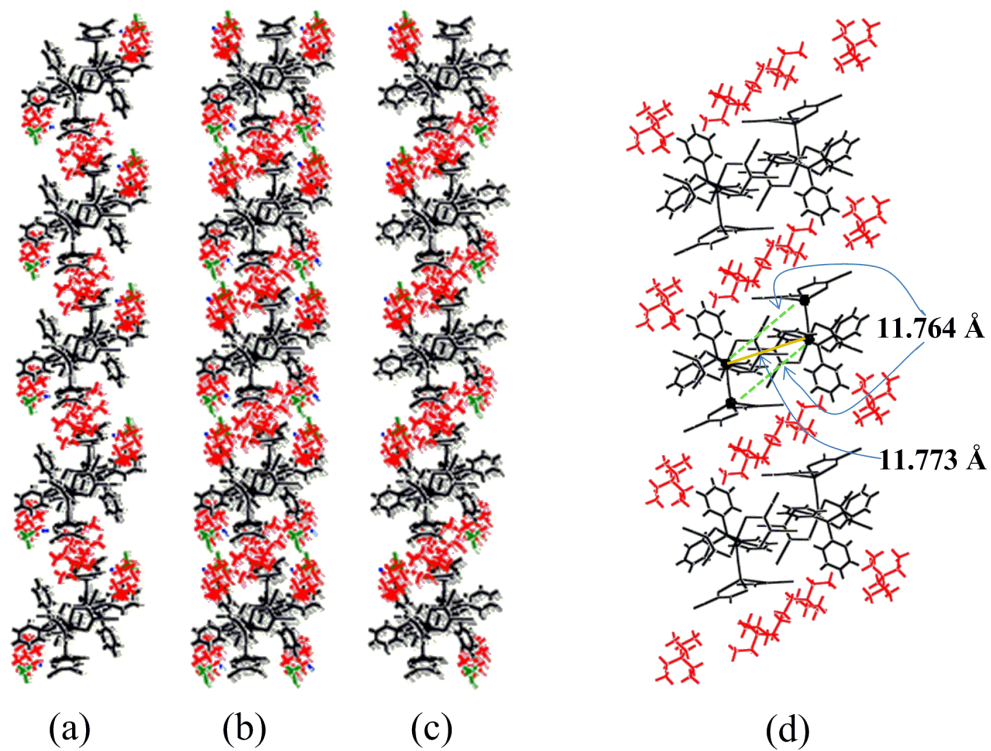

**Figure S-5.** Packing diagram. Anions are in black, dichloromethane in green and cations in red. Lattice water molecules are omitted for clarity. (a) right strand, (b) left and right strand together, (c) left strand of the complex **1**, (d) sandwiched anions by cations.

## 8. IR:

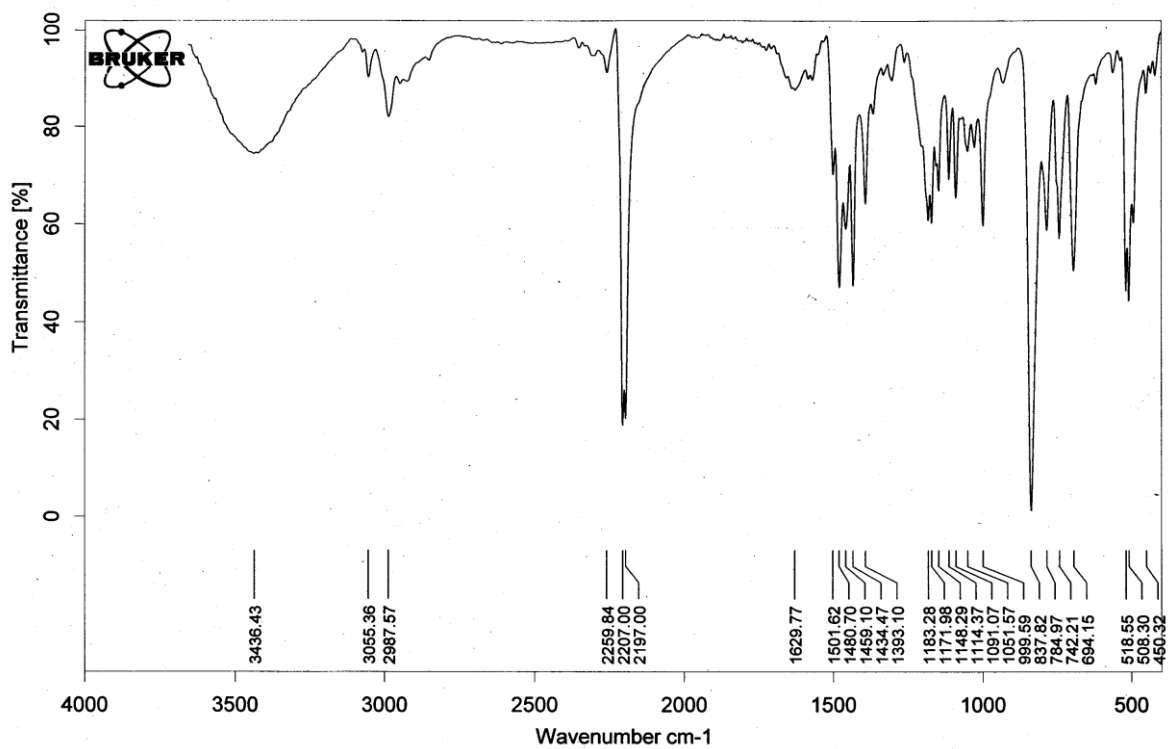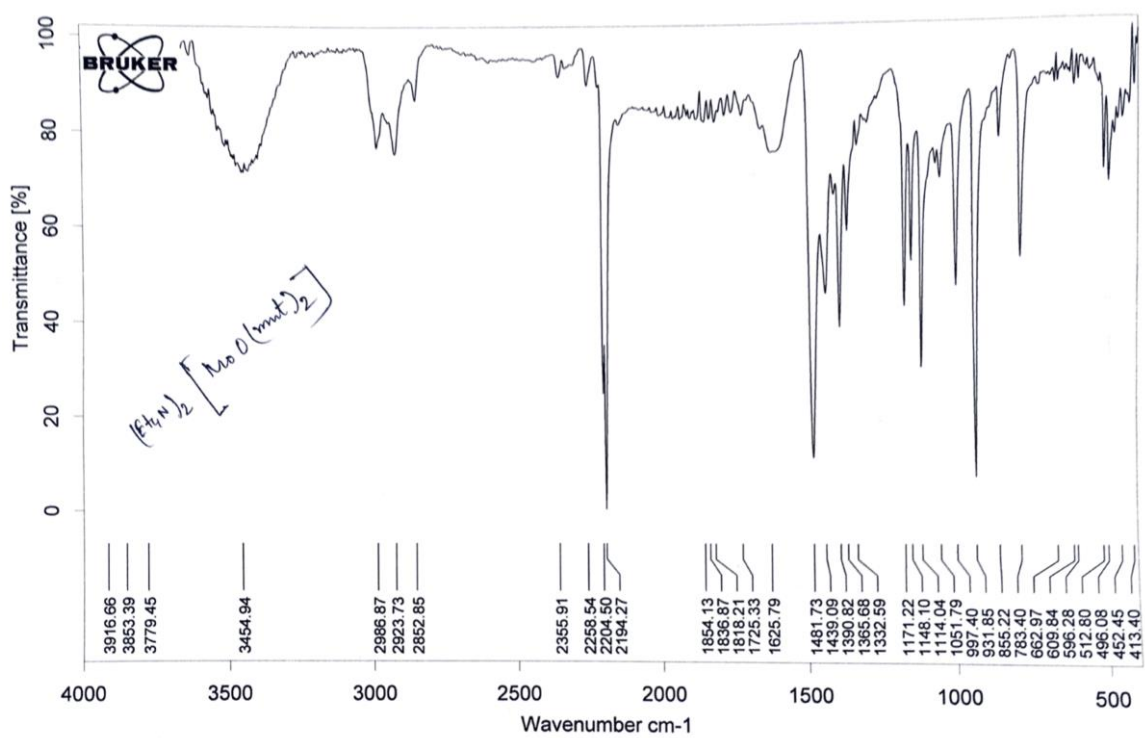

Figure S-6. IR (KBr pellet) spectra of the complex 1 (above) and the complex 2 (below).

## 9. EPR:

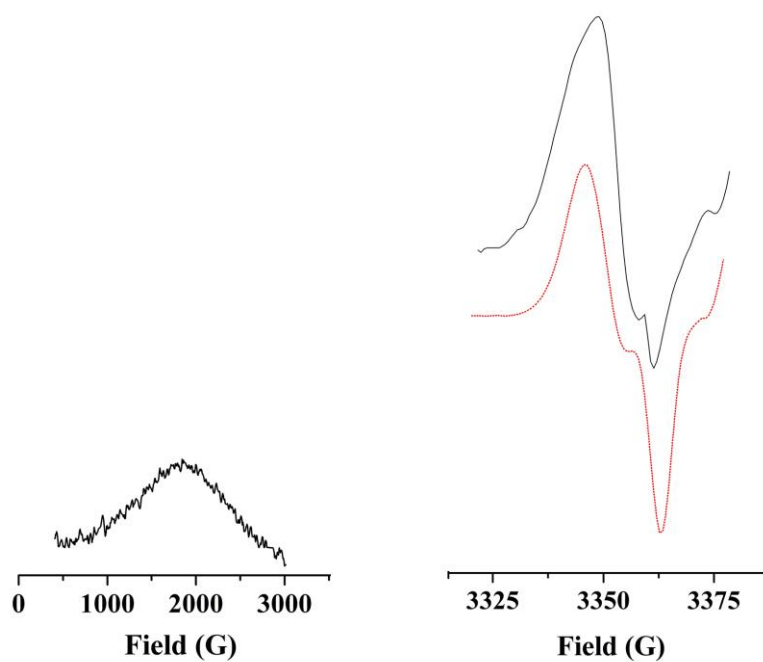

**Figure S-7.** Left: Broad EPR for  $\Delta M_s = 2$ . Right: Coupling due to  $^{31}\text{P}$  ( $I=1/2$ , 100%,  $a(^{31}\text{P})=8$  G). Black (experimental), Red (simulated).

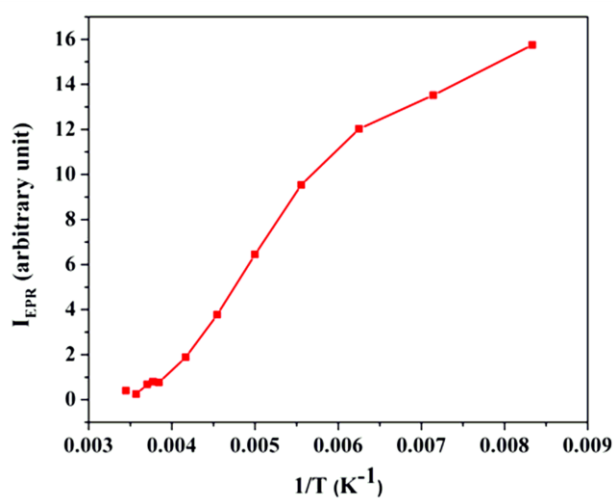

**Figure S-8.** EPR intensity (accomplished by double integration) as a function of  $1/T$ .

## 10. Magnetism.

The presence of the triplet state in **1** as envisaged from the EPR signal is further corroborated by the magnetic study ( $\mu_{\text{eff}}$ , 1.41 B.M.). The unusual linear increase of  $\chi_M T$  vs.  $T$  (Figure S-6) over a wide range from 10-300K demonstrates temperature independent paramagnetism (TIP).<sup>[S1]</sup> Such magnetic behavior is consistent with the complex involving zero-field splitting superimposed with the exchange coupling between the ground singlet and excited triplet state resulting in TIP. A satisfactory fit on  $\chi_M T$  vs.  $T$  curve (Figure S-6) was obtained using

$$\hat{H} = -2J\hat{S}_1\hat{S}_2 + D\left[\hat{S}_z^2 - \frac{1}{3}S(S+1)\right] + g\beta H\hat{S}_z + E(\hat{S}_x^2 - \hat{S}_y^2) \quad (1)$$

the spin Hamiltonian parameter, equation (1),<sup>[S1-S3]</sup> where  $-2J$  is the exchange coupling constant which turns out to be equal to the energy difference between the singlet-triplet states, all other terms have their usual meaning. Using  $g = 1.971$  (fixed),  $D = -83 \times 10^{-4} \text{ cm}^{-1}$  (fixed) and  $E = 55 \times 10^{-5} \text{ cm}^{-1}$  (fixed) obtained from EPR, the best-fit parameters are  $J = -0.50484 \text{ cm}^{-1}$  ( $-144 \times 10^{-5} \text{ Kcal/mole}$ ),  $\chi_{TIP} = 92 \times 10^{-5} \text{ cm}^3 \text{ mol}^{-1}$ . Singlet state is lower in energy as is evident from the sign of the  $J$  value.<sup>[S3]</sup> With such a small energy gap ( $2J = -288 \times 10^{-5} \text{ Kcal/mole}$ ) there has been a detectable population in the triplet state under thermal equilibrium with the singlet state essentially in the entire temperature range.

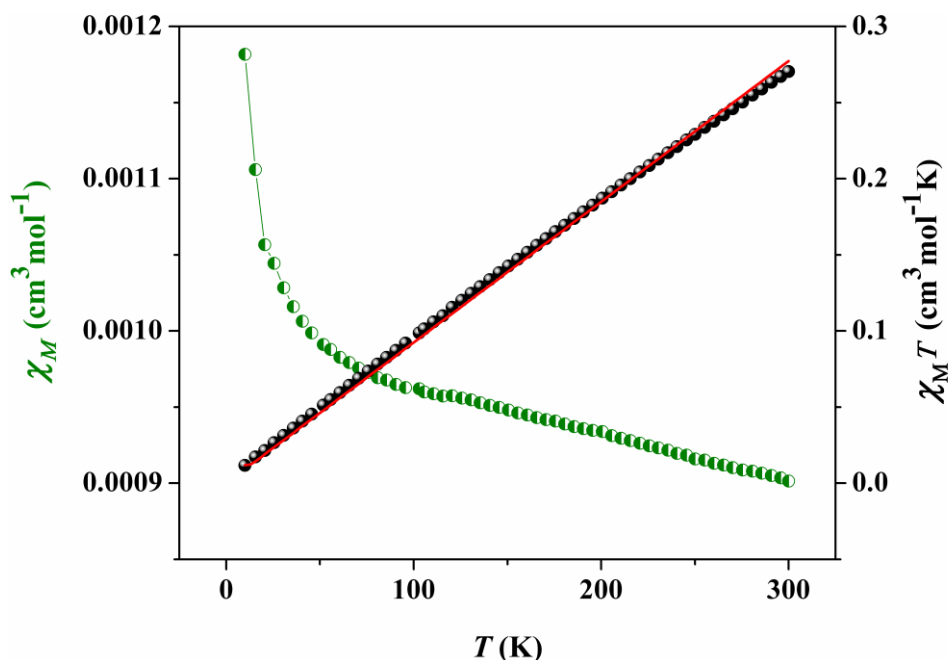

**Figure S-9.** Temperature dependence of  $\chi_M$  (green circles) and  $\chi_M T$  (black circles) of **1**. The black line shows the best fit of  $\chi_M T$ .

## 11. PL Spectra of the Complex 1 at Different Excitation Wavelengths:

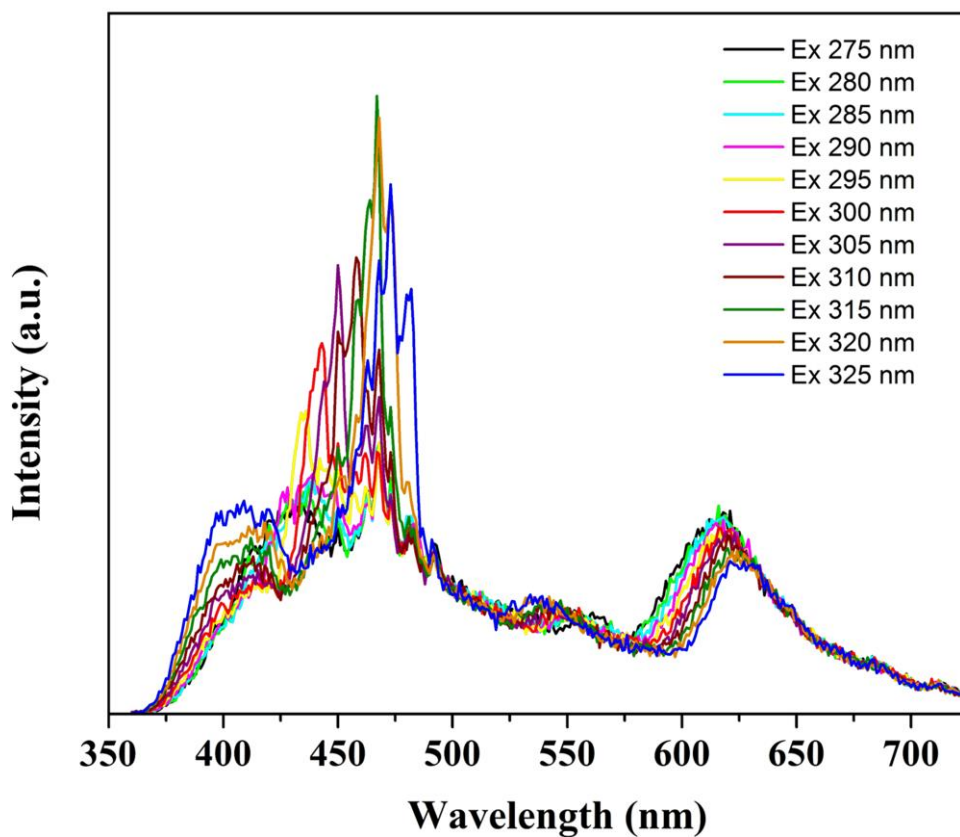

**Figure S-10.** Solid state room temperature luminescence spectra of complex **1** at different excitations from  $\lambda_{\text{ex}} = 275$  nm to 325 nm at 5 nm intervals in air.

**Table S-2.** Emission maxima ( $\lambda_{\text{em}}$ ), and lifetimes of the emitting species ( $\tau$ ) of complex **1** for excitation 325 nm.

| $\lambda_{\text{em}}$ (nm) | $\tau$ ( $\mu\text{s}$ ) |
|----------------------------|--------------------------|
| 470                        | 7.58                     |
| 615                        | 11.45                    |

## 12. Excitation Spectra of the Complex 1 for Emission at 470 nm and 615 nm Wavelengths:

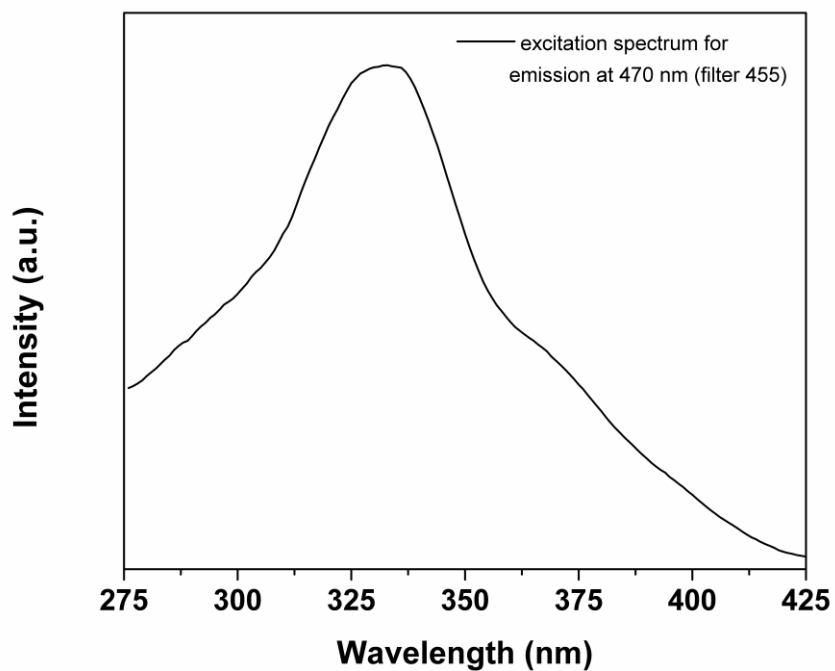

Figure S-11. Excitation spectrum of the complex 1 for emission at 470 nm wavelength.

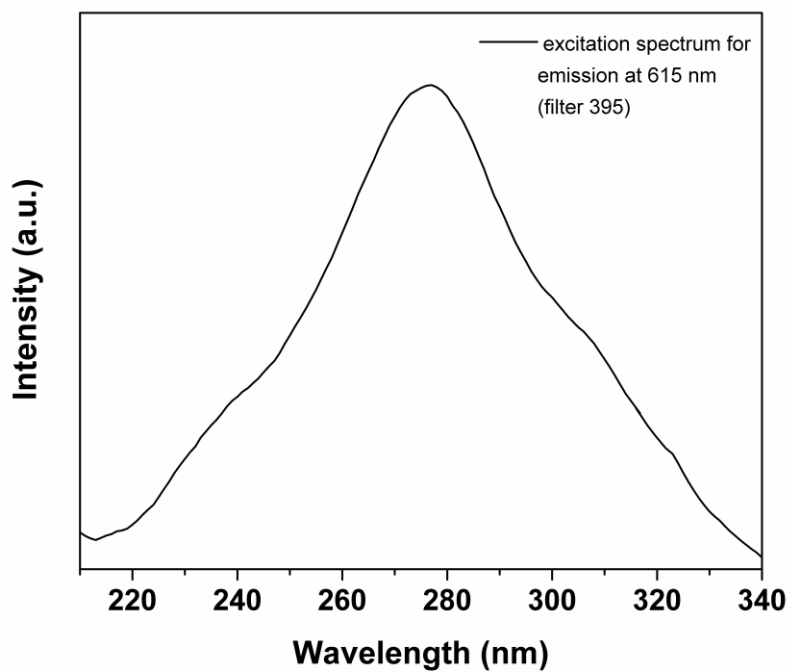

Figure S-12. Excitation spectrum of the complex 1 for emission at 615 nm wavelength.

### 13. Computational Details:

Table S-3. Optimized geometry of complex 1 in the singlet state in gas phase.  $E = -5480.0435983$  (hartree).

|    |             |             |             |
|----|-------------|-------------|-------------|
| Mo | 1.11810800  | -1.05505400 | 0.66649700  |
| S  | 0.25377700  | -0.92342500 | 2.90846600  |
| S  | 3.14443900  | -0.42571500 | 1.76594900  |
| S  | 2.55548500  | -2.44729000 | -0.62946600 |
| S  | -0.32188100 | -2.97742700 | 0.51179300  |
| P  | 1.90741100  | 0.77195100  | -1.04024200 |
| O  | -0.64174200 | 0.00613400  | 0.18704900  |
| N  | 1.06945300  | -0.47520600 | 6.52217100  |
| N  | 4.87043600  | 0.28691500  | 4.98286100  |
| N  | 3.12957700  | -5.75067200 | -2.22734400 |
| N  | -0.62273300 | -6.54004000 | -0.58529900 |
| C  | 1.30223800  | -0.50667300 | 5.38100300  |
| C  | 1.57751900  | -0.54906900 | 3.98032000  |
| C  | 2.84103000  | -0.31307900 | 3.48939700  |
| C  | 3.94643200  | 0.01274400  | 4.32644800  |
| C  | 2.50418500  | -4.97634200 | -1.61975000 |
| C  | 1.77560300  | -3.99589600 | -0.88787400 |
| C  | 0.52590400  | -4.22622200 | -0.36237400 |
| C  | -0.10926200 | -5.49878600 | -0.48962400 |
| Mo | -2.36835500 | 0.48842500  | 0.07733900  |
| S  | -3.69285700 | -0.85908200 | 1.56023700  |
| S  | -3.41367900 | -0.84277700 | -1.62667700 |
| S  | -2.64578800 | 2.27527400  | -1.52916500 |
| S  | -2.79193800 | 2.23872800  | 1.67846200  |
| C  | -5.16334200 | -3.13501000 | 1.25821600  |
| C  | -4.40701800 | -2.14177500 | 0.57011800  |
| C  | -4.28508200 | -2.14080400 | -0.79295800 |
| C  | -4.90247500 | -3.12570000 | -1.61621300 |
| C  | -2.62009200 | 4.99246500  | -1.33124200 |
| C  | -2.66087100 | 3.77502100  | -0.59239100 |
| C  | -2.71979200 | 3.76079900  | 0.77619000  |
| C  | -2.73259000 | 4.96561400  | 1.53582700  |
| N  | -5.78471300 | -3.92600300 | 1.84830800  |
| N  | -5.40019700 | -3.90606200 | -2.32615400 |
| N  | -2.72542400 | 5.93845600  | 2.18045000  |
| N  | -2.57245600 | 5.97049900  | -1.96627600 |
| C  | 3.73531800  | 0.93901700  | -1.29812700 |
| C  | 4.42283200  | 0.03645200  | -2.12717600 |
| H  | 3.87799400  | -0.73604100 | -2.65819700 |
| C  | 5.80709500  | 0.12480900  | -2.27897200 |
| H  | 6.32005300  | -0.58417200 | -2.92379700 |
| C  | 6.52767300  | 1.11078800  | -1.60281200 |
| H  | 7.60691800  | 1.17596600  | -1.71860600 |
| C  | 5.85494400  | 2.00850200  | -0.77301700 |
| H  | 6.40576000  | 2.77747500  | -0.23734700 |
| C  | 4.47020400  | 1.92357500  | -0.62013300 |
| H  | 3.96088800  | 2.62631500  | 0.03044300  |
| C  | 1.40227500  | 2.47320500  | -0.53225600 |
| C  | 1.24552600  | 2.76021100  | 0.83208500  |
| H  | 1.35245100  | 1.97182600  | 1.56884800  |
| C  | 0.93040800  | 4.05443700  | 1.24945700  |
| H  | 0.79304400  | 4.25696400  | 2.30762400  |
| C  | 0.75401600  | 5.07124000  | 0.31083100  |
| H  | 0.47434100  | 6.06929300  | 0.63605100  |
| C  | 0.89354100  | 4.79021100  | -1.05005500 |
| H  | 0.71689400  | 5.56804100  | -1.78735800 |
| C  | 1.21486800  | 3.49982800  | -1.47060700 |
| H  | 1.29324900  | 3.29052800  | -2.53180100 |
| C  | 1.27190500  | 0.53078000  | -2.75639100 |
| C  | 1.89375900  | 1.13594400  | -3.86297800 |
| H  | 2.78503200  | 1.73992700  | -3.72464600 |
| C  | 1.38408000  | 0.95322100  | -5.14874200 |
| H  | 1.87660400  | 1.42819700  | -5.99394400 |
| C  | 0.24959100  | 0.16335100  | -5.34771100 |
| H  | -0.14802500 | 0.02280700  | -6.34980500 |
| C  | -0.37079600 | -0.44516400 | -4.25660900 |
| H  | -1.25748700 | -1.05708300 | -4.39233300 |
| C  | 0.13814200  | -0.26682500 | -2.96865600 |
| H  | -0.35972000 | -0.74296300 | -2.13302500 |

**Table S-4. Optimized geometry of complex 1 in the triplet state in gas phase. E = -5480.0346163(hartree).**

|    |             |             |             |
|----|-------------|-------------|-------------|
| Mo | 0.91484600  | -1.19463500 | 0.39341100  |
| S  | 0.78769000  | -0.30996500 | 2.71615800  |
| S  | 3.21825400  | -1.69695100 | 1.05831400  |
| S  | 1.14472100  | -2.43744600 | -1.70031400 |
| S  | -0.10342300 | -3.22563700 | 1.18392600  |
| P  | 2.01403700  | 0.89859500  | -1.05554100 |
| O  | -0.74259900 | -0.07374700 | 0.15427100  |
| N  | 2.42089800  | -0.48272500 | 6.05352500  |
| N  | 5.48587600  | -2.18904000 | 3.94106600  |
| N  | 0.99984200  | -5.81918400 | -3.20561400 |
| N  | -0.67360400 | -6.81616400 | 0.43093900  |
| C  | 2.34570800  | -0.67230200 | 4.90603900  |
| C  | 2.23615900  | -0.88871900 | 3.49694700  |
| C  | 3.27430700  | -1.46730300 | 2.79659500  |
| C  | 4.48384400  | -1.86109800 | 3.44271200  |
| C  | 0.82702700  | -5.04684800 | -2.34958600 |
| C  | 0.64516500  | -4.07237700 | -1.32318800 |
| C  | 0.09212700  | -4.39723200 | -0.10445000 |
| C  | -0.33169000 | -5.73085200 | 0.17940100  |
| Mo | -2.42539300 | 0.61404800  | 0.23492100  |
| S  | -3.83202400 | -0.78128500 | 1.57119900  |
| S  | -3.68131300 | -0.31947700 | -1.58483800 |
| S  | -2.57694500 | 2.63118500  | -1.06134500 |
| S  | -2.55418600 | 2.12590900  | 2.09582800  |
| C  | -5.55746800 | -2.82240300 | 1.02951600  |
| C  | -4.72086700 | -1.82479100 | 0.44957600  |
| C  | -4.65333600 | -1.63233500 | -0.90321800 |
| C  | -5.40692200 | -2.41509500 | -1.82461600 |
| C  | -2.28435500 | 5.27661200  | -0.48063200 |
| C  | -2.39195400 | 3.97125000  | 0.07786500  |
| C  | -2.37337200 | 3.75268100  | 1.43006600  |
| C  | -2.23831200 | 4.82556300  | 2.35862400  |
| N  | -6.24147400 | -3.62199800 | 1.53193800  |
| N  | -6.01203300 | -3.03167400 | -2.60811400 |
| N  | -2.12504900 | 5.68988700  | 3.13355500  |
| N  | -2.18961000 | 6.33067600  | -0.97260900 |
| C  | 3.83075900  | 0.77990000  | -1.39881600 |
| C  | 4.30632100  | -0.35689100 | -2.07501200 |
| H  | 3.61604700  | -1.14073900 | -2.37298800 |
| C  | 5.66335800  | -0.49500600 | -2.36120700 |
| H  | 6.01272700  | -1.38336800 | -2.88081300 |
| C  | 6.56934400  | 0.49400600  | -1.96989400 |
| H  | 7.62907800  | 0.38091500  | -2.18557700 |
| C  | 6.10740400  | 1.62213800  | -1.29272000 |
| H  | 6.80445300  | 2.39555300  | -0.97924900 |
| C  | 4.74637100  | 1.76659100  | -1.00930200 |
| H  | 4.40075000  | 2.64830500  | -0.48065000 |
| C  | 1.82312900  | 2.53172600  | -0.22561800 |
| C  | 2.20138000  | 2.64064900  | 1.12364000  |
| H  | 2.57921000  | 1.77332600  | 1.65446600  |
| C  | 2.06807900  | 3.85445800  | 1.79713400  |
| H  | 2.35018800  | 3.91902100  | 2.84436800  |
| C  | 1.54290100  | 4.96862000  | 1.13848100  |
| H  | 1.41057800  | 5.90548800  | 1.67261300  |
| C  | 1.15903100  | 4.86695600  | -0.19939700 |
| H  | 0.71939700  | 5.71954500  | -0.70826800 |
| C  | 1.29723000  | 3.65478500  | -0.87987400 |
| H  | 0.97543800  | 3.58204100  | -1.91274900 |
| C  | 1.32364200  | 1.12925100  | -2.75364500 |
| C  | 2.06544500  | 1.76569000  | -3.76452300 |
| H  | 3.06864300  | 2.12509100  | -3.55695100 |
| C  | 1.52422500  | 1.93409700  | -5.03865400 |
| H  | 2.10981800  | 2.42772100  | -5.81067900 |
| C  | 0.23781200  | 1.46720600  | -5.32180200 |
| H  | -0.18199400 | 1.59630300  | -6.31642800 |
| C  | -0.50497600 | 0.83454800  | -4.32567100 |
| H  | -1.50617500 | 0.46705200  | -4.53039100 |
| C  | 0.03316500  | 0.66462500  | -3.04774400 |
| H  | -0.55730100 | 0.17109400  | -2.28550100 |



Orbital energies from single point calculation by taking xyz of optimized singlet and triplet

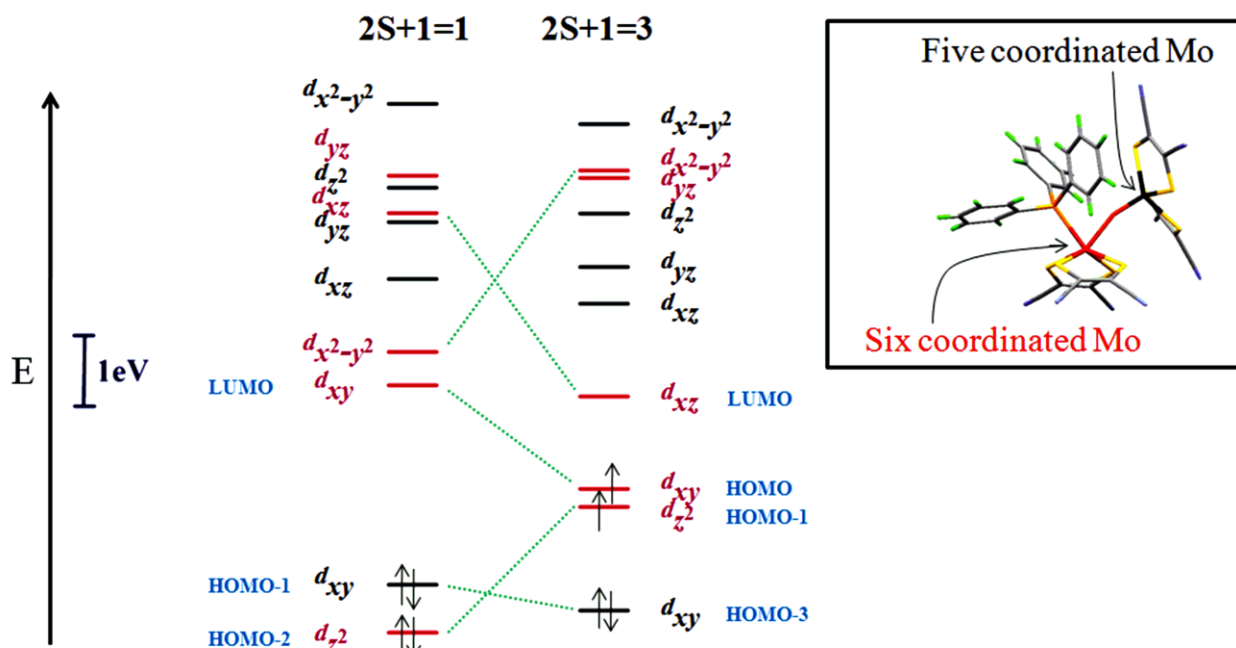

**Figure S-13.** Orbitals' energy in the singlet and triplet states. Red bars correspond to hexa-coordinated Mo and black bars correspond to penta-coordinated Mo.

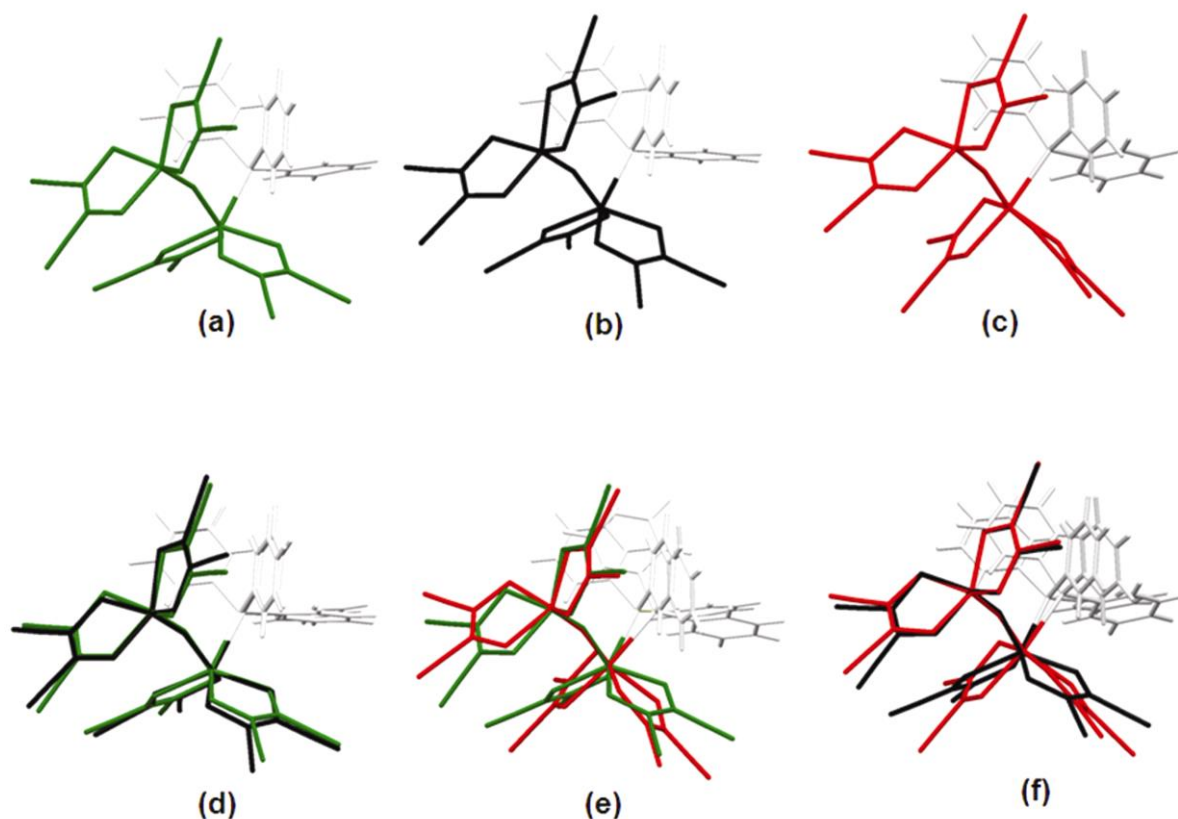

**Figure S-14.** Geometry of (a) X-ray structure, (b) optimized singlet, (c) optimized triplet, (d) Overlapping X-ray structure with optimized singlet, (e) Overlapping X-ray structure with optimized triplet (f), Overlapping optimized singlet with optimized triplet. Triphenylphosphine has shown as white for clarity.

**Table S-5. Comparison of selected parameters obtained from crystal structure and DFT optimized structures**

| Parameters                                   | Crystal Structure | Optimized Singlet | Optimized Triplet |
|----------------------------------------------|-------------------|-------------------|-------------------|
| <b>Distances (Å)</b>                         |                   |                   |                   |
| Mo(1) - S(1)                                 | 2.357(2)          | 2.406             | 2.489             |
| Mo(1) - S(2)                                 | 2.320(2)          | 2.390             | 2.450             |
| Mo(1) - S(3)                                 | 2.321(2)          | 2.384             | 2.446             |
| Mo(1) - S(4)                                 | 2.374(2)          | 2.407             | 2.406             |
| C(2) - S(1)                                  | 1.715(6)          | 1.744             | 1.744             |
| C(3) - S(2)                                  | 1.749(6)          | 1.754             | 1.754             |
| C(2) - C(3)                                  | 1.360(9)          | 1.376             | 1.379             |
| C(6) - S(3)                                  | 1.746(6)          | 1.753             | 1.751             |
| C(7) - S(4)                                  | 1.705(7)          | 1.744             | 1.752             |
| C(6) - C(7)                                  | 1.388(9)          | 1.375             | 1.377             |
| Mo(2) - S(5)                                 | 2.345(2)          | 2.402             | 2.390             |
| Mo(2) - S(6)                                 | 2.361(2)          | 2.402             | 2.400             |
| Mo(2) - S(7)                                 | 2.367(2)          | 2.419             | 2.403             |
| Mo(2) - S(8)                                 | 2.348(2)          | 2.410             | 2.401             |
| C(10) - S(5)                                 | 1.757(7)          | 1.771             | 1.771             |
| C(11)-S(6)                                   | 1.764(7)          | 1.772             | 1.770             |
| C(10) - C(11)                                | 1.334(10)         | 1.369             | 1.368             |
| C(14) - S(7)                                 | 1.749(6)          | 1.768             | 1.769             |
| C(15) - S(8)                                 | 1.753(6)          | 1.771             | 1.768             |
| C(14) - C(15)                                | 1.368(9)          | 1.370             | 1.370             |
| Mo(2) - O(1)                                 | 1.739(4)          | 1.796             | 1.820             |
| Mo(1) - O(1)                                 | 2.094(4)          | 2.110             | 2.015             |
| Mo(1) - P(1)                                 | 2.542(2)          | 2.622             | 2.773             |
| <b>Angles (°)</b>                            |                   |                   |                   |
| Mo(2)-O(1)-Mo(1)                             | 159.1(2)          | 161.92            | 164.93            |
| O(1)-Mo(1)-P(1)                              | 74.06(11)         | 75.68             | 81.03             |
| Mo(1)-S-C <sub>dithiolene</sub> <sup>a</sup> | 108.35            | 108.59            | 105.49            |
| Mo(2)-S-C <sub>dithiolene</sub> <sup>a</sup> | 105.15            | 106.32            | 106.46            |

<sup>a</sup>average

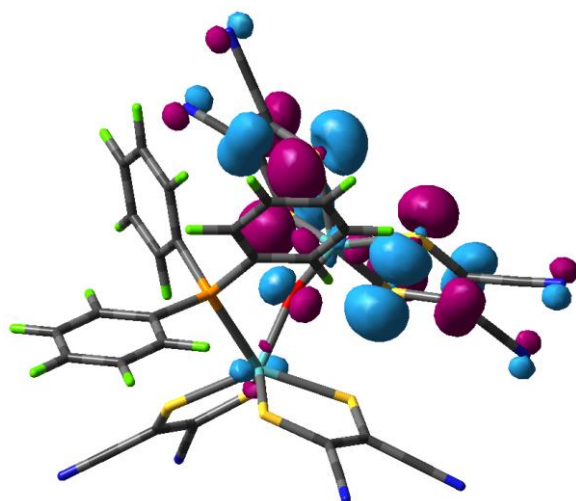

Figure S-15. HOMO for the complex **1** in the ground singlet state.

Table S-6. TD-DFT calculations based on the ground state geometry.

| State | Energy (eV) | Main excitation(%) <sup>[a]</sup>          | Assignment (f) <sup>[b]</sup> | TD-DFT<br>$\lambda_{\max}$ (nm) <sup>[c]</sup> | Exp.<br>$\lambda_{\max}$ (nm) |
|-------|-------------|--------------------------------------------|-------------------------------|------------------------------------------------|-------------------------------|
| 3     | 1.7569      | H-2→L(31)<br>H-1→L(19)<br>H→L(42)          | M'MLCT<br>ML'MLCT (0.0254)    | 705                                            | 657                           |
| 8     | 2.3073      | H-4→L(28)<br>H-3→L(52)                     | L'MLCT (0.0248)               | 537                                            | 553                           |
| 13    | 2.6463      | H-4→L+1(38)<br>H-3→L(52)                   | L'MLCT (0.0233)               | 468                                            | 470                           |
| 25    | 3.1544      | H-6→L(50)<br>H-2→L+3(10)                   | L'MLCT (0.045)                | 393                                            | 395                           |
| 40    | 3.5193      | H-3→L+4(42)<br>H-2→L+4(11)                 | LLCT (0.0299)                 | 352                                            | 362                           |
| 41    | 3.5218      | H-9→L(15)<br>H-4→L+3(20)<br>H-3→L+3(45)    | LLCT (0.0203)                 | 352                                            |                               |
| 69    | 4.0040      | H-13→L(11) H-<br>5→L+4(15) H-<br>4→L+5(11) | LLCT (0.0332)                 | 309                                            | 294                           |
| 102   | 4.4061      | H-13→L+1(11)<br>H-9→L+2(42)                | LLCT (0.0714)                 | 281                                            |                               |

<sup>[a]</sup> H and L denote HOMO and LUMO, respectively. <sup>[b]</sup> The values between parentheses indicate oscillator strength, f. <sup>[c]</sup> In gas phase.

#### 14. References:

- S1. M. M. Rohmer, I. P. C. Liu, J.-C. Lin, M. J. Chiu, C.-H. Lee, G.-H. Lee, M. Benard, X. Lopez, S.-M. Peng, *Angew. Chem. Int. Ed.* 2007, **46**, 3533-3536.
- S2. R. Boca, *Coord. Chem. Rev.* 2004, **248**, 757-815.
- S3. O. Kahn, *Molecular Magnetism*; VCH: New York, 1993.
